# Supplementary material for: Rolling and ordering of micro rods in shear flow induced by rod wall interactions
Source: Royal Society of Chemistry journal article supplement (doi:10.1039/d4sm00999a), 2024-01-01
Supplement: d4sm00999a3.pdf [file d4sm00999a3.pdf]

# Rolling and ordering of micro rods in shear flow induced by rod wall interactions.

Martin Wittmann<sup>1</sup>, Igor M. Kulić<sup>2</sup>, Antonio Stocco<sup>2</sup> and Juliane Simmchen<sup>3</sup>

<sup>1</sup>Physical Chemistry TU Dresden, Zellescher Weg 19, 01062 Dresden, Germany

<sup>2</sup>Institut Charles Sadron, CNRS UPR-22, 23 rue du Loess, Strasbourg, France.

<sup>3</sup>Pure and applied chemistry, University of Strathclyde, Cathedral Street,  
Glasgow, UK

October 29, 2024

## S1 List of SI Videos

- SIVideo1\_DifferentFlowSpeedsDIWater.avi - Glass rods in DI water at different flow rates (2.5 mL/h, 5 mL/h, 10 mL/h)
- SIVideo2\_2.5mLperhNaCl.avi - Glass rods in a flow rate of 2.5 mL/h in different solvents (DI water, 10<sup>-5</sup> M NaCl, 10<sup>-4</sup> M NaCl)

## S2 Determination of the Debye length

The Debye length  $\lambda_D$  is given by [Equation S1](#) and is essential to predict the electrostatic interaction between rod and substrate.

$$\lambda_D = \kappa^{-1} = \left( \frac{e^2 N_A}{\varepsilon_0 \varepsilon_r k_B T} \sum_i c_i \right)^{-1/2} \quad (\text{S1})$$

In the sum of the concentrations of ions present in the solution ( $\sum_i c_i$ ) different contributions have to be considered:

- $\text{H}^+$  and  $\text{OH}^-$ :  $10^{-7}$  M for each ion at pH 7  $\rightarrow 2 \times 10^{-7}$  M
- $\text{CO}_2$  from the ambient atmosphere forms  $\text{H}_2\text{CO}_3$  and dissociates to  $\text{H}^+$  and  $\text{HCO}_3^-$  in the solution. The concentrations can be determined by measuring the electrical conductivity and using the molar conductivity
- The added NaCl with a known concentration

While the concentrations of  $\text{H}^+$ ,  $\text{OH}^-$  and the added NaCl are known, the contribution from  $\text{H}^+$  and  $\text{HCO}_3^-$  from ambient  $\text{CO}_2$  has to be determined, which can be done using the specific conductivity  $\kappa_{\text{conduct}}$  of the solution. As the concentrations are very low, we can estimate, that  $\kappa_{\text{conduct}} = c\Lambda_m^0$ . Here,  $\Lambda_m^0$  is the limiting molar conductivity at infinite dilution, which can be calculated from the limiting molar conductivities of the individual ions<sup>[1]</sup>:

$$\begin{aligned} \Lambda_m^0(\text{H}^+ + \text{HCO}_3^-) &= \lambda_m^0(\text{H}^+) + \lambda_m^0(\text{HCO}_3^-) \\ \Lambda_m^0(\text{H}^+ + \text{HCO}_3^-) &= (349.65 + 44.5) \cdot 10^{-4} \text{ m}^2\text{S/mol} \\ \Lambda_m^0(\text{H}^+ + \text{HCO}_3^-) &= 394.15 \cdot 10^{-4} \text{ m}^2\text{S/mol} \end{aligned}$$

The DI water used in the experiments had a specific conductivity of  $\kappa_{\text{conduct}} = 0.59 \text{ }\mu\text{S/cm}$ . Subtracting the specific conductivity of ultrapure water and dividing by the limiting molar conductivity, we get the concentration of  $\text{H}^+$  and  $\text{HCO}_3^-$  originating from ambient  $\text{CO}_2$ :

$$\begin{aligned} c(\text{H}^+ + \text{HCO}_3^-) &= \frac{\kappa_{\text{conduct}} - \kappa_{\text{conduct}}(\text{ultrapure})}{\Lambda_m^0(\text{H}^+ + \text{HCO}_3^-)} \\ c(\text{H}^+ + \text{HCO}_3^-) &= \frac{0.59 \text{ }\mu\text{S/cm} - 0.055 \text{ }\mu\text{S/cm}}{394.15 \cdot 10^{-4} \text{ m}^2\text{S/mol}} \\ c(\text{H}^+ + \text{HCO}_3^-) &= 1.36 \cdot 10^{-6} \text{ mol/L} \end{aligned}$$

The expected contribution of the conductivity of NaCl ( $\Lambda_m^0(\text{NaCl}) = 126.39 \cdot 10^{-4} \text{ m}^2\text{S/mol}$ )<sup>[1]</sup> to the total specific conductivity can be estimated and the values are summarised in [Table S1](#). Looking at the measured conductivity of the  $10^{-6} \text{ M}$  NaCl it is noteworthy, that measured conductivity shows a higher increase than expected purely from the contribution of NaCl. We explain this by a longer preparation process of the NaCl solutions, where they are exposed to ambient  $\text{CO}_2$ . Therefore, we assume this contribution for all concentrations of NaCl.

Table S1: Determination of Debye length using the specific conductivity.

| Solution                 | $\kappa_{conduct}$<br>in $\mu\text{S/cm}$ | $\kappa_{conduct}(\text{NaCl})$<br>in $\mu\text{S/cm}$ | $c(\text{CO}_2)$<br>in $\mu\text{M}$ | Debye length<br>in nm |
|--------------------------|-------------------------------------------|--------------------------------------------------------|--------------------------------------|-----------------------|
| DI water                 | 0.59                                      | 0                                                      | 1.36                                 | 254                   |
| $10^{-6} \text{ M}$ NaCl | 1.57                                      | 0.126                                                  | 3.5                                  | 143                   |
| $10^{-5} \text{ M}$ NaCl | 2.56                                      | 1.26                                                   | 3.5                                  | 83                    |
| $10^{-4} \text{ M}$ NaCl | 12.63                                     | 12.63                                                  | 3.5                                  | 30                    |

## S3 Determination of the height.

### S3.1 Measuring height using the velocity $v$

For a Poiseuille flow through square  $H \times H$  cross-section in the x direction of a long channel and a given volumetric flow rate  $Q$ , pressure gradient  $G = -\frac{dp}{dx}$  and viscosity  $\eta$  the flow field  $u(y, z)$  is given by the following equation: (as derived by Boussinesq)<sup>[2]</sup>

$$u(y, z) = \frac{G}{2\eta}y(H - y) - \frac{4GH^2}{\eta\pi^3} \sum_{n=1}^{\infty} \frac{1}{(2n - 1)^3} \frac{\sinh(\beta_n z) + \sinh[\beta_n(H - z)]}{\sinh(\beta_n H)} \sin(\beta_n y)$$

$$\beta_n = \frac{(2n - 1)\pi}{H},$$

$$Q = \frac{GH^4}{\eta} \left( \frac{1}{12} - \frac{16}{\pi^5} \sum_{n=1}^{\infty} \frac{1}{(2n - 1)^5} \frac{\cosh(\beta_n H) - 1}{\sinh(\beta_n H)} \right)$$

The relation for the flow rate can be approximated

$$Q \approx 0.035 \frac{GH^4}{\eta}$$

from which we can estimate pressure drop

$$G = 28.6 \frac{\eta Q}{H^4} = 7.94 \frac{Pa}{m} \cdot q$$

where  $q = Q / \left(\frac{mL}{h}\right)$  is the non-dimensional flow rate.

We assume that we are close to the bottom in the  $z$ -direction, i.e.  $z/H \ll 1$  very small, and to be in the centre of the channel in the  $y$ -direction,  $y = \frac{H}{2}$ , giving the velocity profile:

$$u(z) \approx 0.38 \frac{GH^2}{\eta} \frac{z}{H} + O(z^2)$$

Replacing  $G = 28.6 \frac{\eta Q}{H^4}$  we obtain

$$u(z) = \dot{\gamma} z + O(z^2) \tag{S2}$$

with the (close to the wall) shear rate given by

$$\dot{\gamma} = 10.87 \frac{Q}{H^3} \tag{S3}$$

Assuming that a rod in a shear flow is moving with the velocity of the fluid at its center of mass ( $z$ ), the velocity  $v$  is given as:

$$\begin{aligned} v(z) &= \dot{\gamma} \cdot z \\ z &= h + r \end{aligned}$$

Where  $h$  and  $r$  are the (surface-surface) height and the radius of the rod. The obtained data for the different concentrations of NaCl are summarized in [Table S2](#).

Table S2: Height between rod and substrate measured using the velocity.

| Solution         | $v$ at 5 mL/h in $\mu\text{m/s}$ | $z$ in nm | $h$ in nm |
|------------------|----------------------------------|-----------|-----------|
| DI water         | 36.8                             | 2440      | 940       |
| $10^{-6}$ M NaCl | 26.6                             | 1760      | 260       |
| $10^{-5}$ M NaCl | 23.5                             | 1560      | 60        |
| $10^{-6}$ M NaCl | 26.6                             | 1030      | -470      |

### S3.2 Prediction of height considering the potential as the sum of electrostatic interaction and gravity

According to<sup>[3]</sup>, the electrostatic interaction potential of a rod with a length  $L$ , radius  $r$ , a zeta potential  $\zeta_{rod}$  and a height  $h$  with a wall with a zeta potential  $\zeta_{wall}$  is given as:

$$U_E(h) = 64\pi LB \sqrt{\frac{\kappa r}{2\pi}} e^{-\kappa h} \quad (\text{S4})$$

$$B = \varepsilon_0 \varepsilon_r \left( \frac{k_B T}{e} \right)^2 \tanh \left( \frac{e \zeta_{rod}}{4k_B T} \right) \tanh \left( \frac{e \zeta_{wall}}{4k_B T} \right)$$

With a density mismatch between rod and solvent  $\Delta\rho$  the gravitational potential is given as:

$$U_G(h) = \pi r^2 L g \Delta\rho h$$

Balancing the two potentials (minimizing  $U(h) = U_E + U_G$ ) we get

$$U'(h) = 0 = \pi r^2 L g \Delta\rho - 64\pi LB \kappa \sqrt{\frac{\kappa r}{2\pi}} e^{-\kappa h}$$

$$h = \frac{1}{\kappa} \ln \left( \frac{64B \kappa \sqrt{\frac{\kappa r}{2\pi}}}{r^2 g \Delta\rho} \right) \quad (\text{S5})$$

For  $\zeta_{rod} = -36$  mV (experimental value),  $\zeta_{wall} = -40$  mV (estimated value for glass), the Debye lengths  $\kappa^{-1}$  from [Table S1](#) and  $\Delta\rho = 1.6$  g/cm<sup>3</sup> we get the following heights summarized in [Table S3](#).

Table S3: Height between rod and substrate predicted considering the potential as the sum of electrostatic interaction and gravity.

| Solution         | Debye length in nm | $h$ in nm |
|------------------|--------------------|-----------|
| DI water         | 254                | 1520      |
| $10^{-6}$ M NaCl | 143                | 980       |
| $10^{-5}$ M NaCl | 83                 | 640       |
| $10^{-4}$ M NaCl | 30                 | 280       |

### S3.3 Measuring height using the rotational diffusion

A micro rod near a wall shows translational diffusion in the perpendicular and parallel direction with respect to the rod long axis ( $D_{\perp}$  and  $D_{\parallel}$ ) and rotational diffusion parallel to the wall normal ( $D_{rot}$ ), which are influenced by the presence of the nearby wall and therefore can be used to estimate the height. The rotational diffusion ( $D_{rot}$ ) will be used here and a prediction from [Hunt \*et al.\*](#) was applied to quantify the influence of a wall on its magnitude.<sup>[4]</sup> There, the rotational friction coefficient near a wall ( $\xi_{rot}$ ) is given as:

$$\xi_{rot} = \frac{4\pi\eta}{\cosh^{-1}(z/r)} \cdot \frac{L_1^3 + L_2^3}{3} \quad (\text{S6})$$

Here,  $L_1$  and  $L_2$  are the distances of the ends from the rotation axis and if it is located at the centre of the rod we get  $L_1 = L_2 = L/2$ .  $z$  is the  $z$ -position of the center of mass and therefore

$h = z - r$ . The diffusion coefficient is given as:  $D_{rot} = \frac{k_b T}{\xi_{rot}}$  which leads to [Equation S7](#). As the used rods are only homogeneous in diameter but not in length we have to consider the length ([Figure S1a](#)) of the rod and determine the height by fitting the experimental data of  $D_{rot}(L)$  to [Equation S7](#) to get the height  $h$ . An example with data obtained in DI water is displayed in [Figure S1b](#) and results are summarized in [Table S4](#).

$$D_{rot}(L) = \frac{3 \cdot \cosh^{-1}((h+r)/r) k_b T}{\pi \eta L^3} \quad (\text{S7})$$

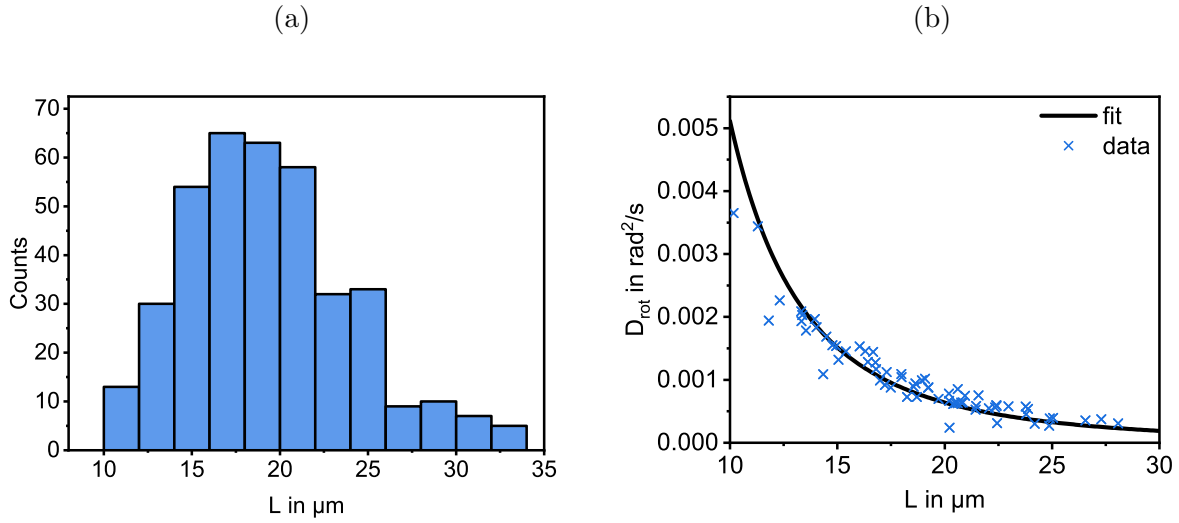

Figure S1: (a) Histogram of lengths of glass micro rods, (b) Experimental data of  $D_{rot}(L)$  for glass rods in DI water with the corresponding fit ( $h = 1070$  nm).

Table S4: Height between rod and substrate measured using the velocity.

| Solution         | $D_{rot}(L = 18 \mu\text{m})$ in $\text{s}^{-1}$ | $h$ in nm |
|------------------|--------------------------------------------------|-----------|
| DI water         | $8.6 \times 10^{-4}$                             | 1070      |
| $10^{-6}$ M NaCl | $8.4 \times 10^{-4}$                             | 1020      |
| $10^{-5}$ M NaCl | $7.2 \times 10^{-4}$                             | 730       |
| $10^{-4}$ M NaCl | $5.3 \times 10^{-4}$                             | 380       |

## S4 The motion-angle - director-angle correlation

### S4.1 Coupling between translation and rotation

Similar to the work of [Teng \*et al.\*](#), the coupling between translation and rotation is given by the resistance matrix  $\mathbf{R}$  (Equation S8).<sup>[5]</sup> Here,  $F_{\perp}$  and  $N$  are the force in the orthogonal direction with respect to the long axis and the torque around the long axis, respectively.  $v$  and  $\omega$  stand for the velocity orthogonal to the long axis and the angular velocity around the long axis, respectively.

$$\begin{pmatrix} F_{\perp} \\ N \end{pmatrix} = \begin{pmatrix} R_{11} & R_{12} \\ R_{21} & R_{22} \end{pmatrix} \begin{pmatrix} v \\ \omega \end{pmatrix} \quad (\text{S8})$$

To get the velocity of a rod rotating at a certain height from the substrate, we apply a force-free rotation ( $F_{\perp} = 0$ ) the resulting velocity is now:

$$v = -\frac{R_{12}}{R_{11}}\omega$$

We can fit the values for  $R_{12}$  and  $R_{11}$  derived by ref<sup>[5]</sup> using OpenFoam simulations as:

$$R_{11} = -\eta \left( \frac{4\pi}{\log(1 + \delta + \sqrt{2\delta + \delta^2})} L + \frac{15\delta}{\delta + 0.005} r \right)$$

$$R_{12}(\delta) = \eta r^2 \frac{32}{3\pi} \log\left(\frac{0.114}{\delta} + 0.904\right)$$

Where,  $L$  and  $r$  are the length and radius of the rod,  $\eta$  is the viscosity and  $\delta = h/r$ . Looking at the resulting velocities normalized to perfect coupling ( $\omega \cdot r$ ) (Figure S2), we get low values in the range of  $10^{-3}$  to  $10^{-2}$ , with a maximum at a height of 70 nm. Notably, the coupling becomes weaker with the increasing length of the rod, as it originates from end effects.

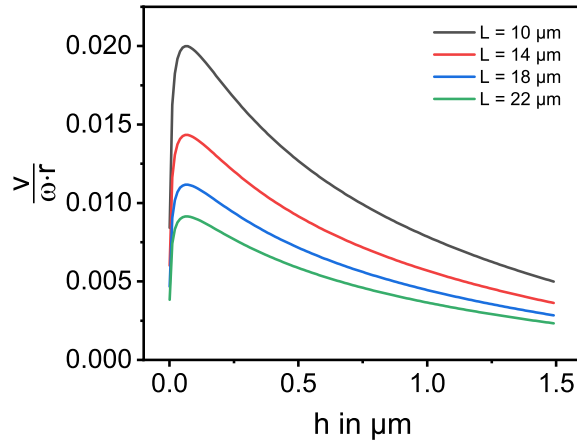

Figure S2: Velocity resulting from a force-free rotation of a rod with  $r = 1.5 \mu\text{m}$  and different lengths normalized on  $\omega \cdot r$ .



## S4.2 Anisotropic mobility

Here, we investigate the origin of the non-trivial relation between the angle of motion  $\beta$  and the orientation angle  $\alpha$  (with respect to the flow direction) in the shear flow. Assuming that the rod is approximately parallel to the substrate, its orientation vector (director)  $\mathbf{t}$  is in the x-y plane and can be expressed in terms of the angle  $\alpha$ :

$$\mathbf{t} = \begin{pmatrix} \sin \alpha \\ \cos \alpha \end{pmatrix}$$

The rod moves parallel to the surface with velocity components

$$\mathbf{v} = \begin{pmatrix} v_x \\ v_y \end{pmatrix}$$

and is acted upon by two types of forces:

- 1) **Bulk drag force**, coming from the mismatch of the rods velocity vector with the bulk flow (in the x-direction) in the rod plane

$$\mathbf{F}_{bulk-flow} = (\xi_{\perp}^b (\mathbf{I} - \mathbf{t}\mathbf{t}) + \xi_{\parallel}^b \mathbf{t}\mathbf{t}) (\mathbf{v}_b - \mathbf{v})$$

$$\mathbf{v}_b = \begin{pmatrix} v_b \\ 0 \end{pmatrix} \text{ (bulk flow velocity)}$$

- 2) **Surface drag force**, coming from the close to surface lubrication contact.

$$\mathbf{F}_{surf} = (\xi_{\perp}^s (\mathbf{I} - \mathbf{t}\mathbf{t}) + \xi_{\parallel}^s \mathbf{t}\mathbf{t}) (0 - \mathbf{v})$$

where the 0 is the vanishing velocity of the wall. Here we introduce the unity operator  $\mathbf{I}$  and matrix " $\mathbf{t}\mathbf{t}$ " =  $\mathbf{t} \cdot \mathbf{t}^T$  (T: the transpose), which is the projector operator onto the director  $\mathbf{t}$ . The two sets of friction coefficients  $(\xi_{\perp}^b, \xi_{\parallel}^b)$  and  $(\xi_{\perp}^s, \xi_{\parallel}^s)$  are the contributions coming from the

pure bulk hydrodynamic friction ( $b$ ) and pure surface/lubrication contribution ( $s$ ) respectively. Total force balance requires  $\mathbf{0} = \mathbf{F}_{bulk-flow} + \mathbf{F}_{surf}$  which implies the relation

$$\mathbf{v} = \left( (\xi_{\perp}^s + \xi_{\perp}^b) (\mathbf{I} - \mathbf{t}\mathbf{t}) + (\xi_{\parallel}^s + \xi_{\parallel}^b) \mathbf{t}\mathbf{t} \right)^{-1} (\xi_{\perp}^b (\mathbf{I} - \mathbf{t}\mathbf{t}) + \xi_{\parallel}^b \mathbf{t}\mathbf{t}) \mathbf{v}_b$$

Using the usual laws for the projectors,  $(\mathbf{I} - \mathbf{t}\mathbf{t})(\mathbf{t}\mathbf{t}) = 0$ ,  $(\mathbf{t}\mathbf{t})^2 = \mathbf{t}\mathbf{t}$ ,  $(\mathbf{I} - \mathbf{t}\mathbf{t})^2 = \mathbf{I} - \mathbf{u}\mathbf{u}$ , the expression simplifies to

$$\begin{aligned} \mathbf{v} &= \left( \frac{\xi_{\perp}^b}{\xi_{\perp}^s + \xi_{\perp}^b} (\mathbf{I} - \mathbf{t}\mathbf{t}) + \frac{\xi_{\parallel}^b}{\xi_{\parallel}^s + \xi_{\parallel}^b} \mathbf{t}\mathbf{t} \right) \mathbf{v}_b \\ &= v_b (r_{\parallel} - r_{\perp}) \begin{pmatrix} \frac{r_{\perp}}{r_{\parallel} - r_{\perp}} + \sin^2 \alpha \\ \cos \alpha \sin \alpha \end{pmatrix} \end{aligned}$$

with the two friction ratios  $r_{\perp} = \frac{\xi_{\perp}^b}{\xi_{\perp}^s + \xi_{\perp}^b}$ ,  $r_{\parallel} = \frac{\xi_{\parallel}^b}{\xi_{\parallel}^s + \xi_{\parallel}^b}$ .

We see that when the surface friction can be neglected ( $\xi_{\perp}^s, \xi_{\parallel}^s = 0$ ) we have the trivial solution  $\mathbf{v} = \mathbf{v}_b$ , i.e. as expected the rod moves with the flow speed and direction, regardless of its tangent  $\mathbf{t}$ .

Abbreviating

$$r_{fr} = \frac{r_{\perp}}{r_{\parallel} - r_{\perp}} = \frac{\xi_{\perp}^b (\xi_{\parallel}^s + \xi_{\parallel}^b)}{\xi_{\parallel}^b (\xi_{\perp}^s + \xi_{\perp}^b) - \xi_{\perp}^b (\xi_{\parallel}^s + \xi_{\parallel}^b)}$$

the motion angle w.r.t. the x-axis is then

$$\cos \beta = \frac{r_{fr} + \sin^2 \alpha}{\sqrt{(2r_{fr} + 1) \sin^2 \alpha + r_{fr}^2}} \quad (\text{S9})$$

which is the relation used in the main text. Fitting the parameter  $r_{fr}$  to our experimental data, we get a value of  $r_{fr} = 38$  in DI water and smaller values down to  $r_{fr} = 13$  with increasing concentration of NaCl (Figure S3).

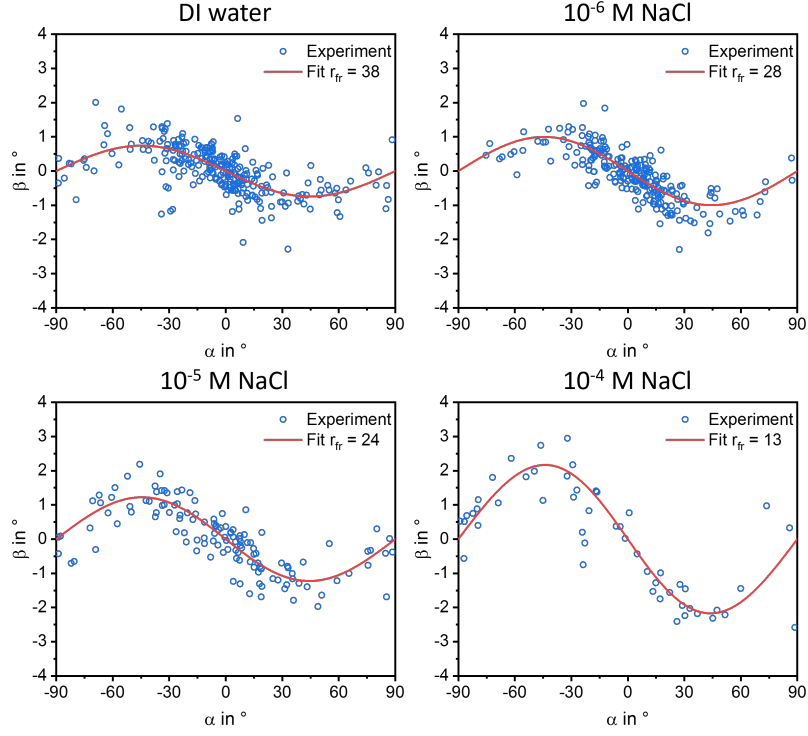

Figure S3: Relation between the rod orientation angle  $\alpha$  and the angle of motion direction  $\beta$  at a flow rate of 2.5 mL/h in DI water and NaCl with a fit using [Equation S9](#).

## S5 Tilting potential of the rod near wall

Before, the height of a rod was determined considering an orientation parallel to the wall. If we allow now for a slight tilt and introduce a tilting angle  $\tau$ , the rods total energy is given by [Equation S10](#) with an interaction potential  $w(h)$  density per unit length integrated over the full length  $L$ , where the integral goes over the arc length of the rod  $s$ .

$$W(h, \tau) = \int_{-L/2}^{+L/2} w(h + s \sin(\tau)) ds \quad (\text{S10})$$

Assuming a small tilting angle  $\tau$  we can Taylor expand  $w(h + s \sin(\tau)) \approx w(h) + w'(h) s \sin(\tau) + \frac{1}{2} w''(h) s^2 \sin^2(\tau)$  and the energy simplifies

$$W(h, \tau) = Lw(h) + w''(h) \sin^2(\tau) \frac{L^3}{24} \quad (\text{S11})$$

Specializing now to the electrostatic potential of a rod near a wall ([Equation S4](#)) we get:

$$w(h) = \frac{U_E(h)}{L} = 64\pi B \sqrt{\frac{\kappa r}{2\pi}} e^{-\kappa h}$$

with the second derivative

$$w''(h) = 64\pi \kappa^2 B \sqrt{\frac{\kappa r}{2\pi}} e^{-\kappa h}$$

The harmonic stiffness constant  $a$  of the tilting variable is finally given as:

$$a = \frac{w''(h) L^3}{12}$$

$$a = \frac{16\pi \kappa^2 B L^3}{3} \sqrt{\frac{\kappa r}{2\pi}} e^{-\kappa h}$$

If we now insert [Equation S5](#) for  $h$  depending on  $\kappa$  we get:

$$a = \frac{\kappa \pi r^2 g \Delta \rho L^3}{12} \tag{S12}$$

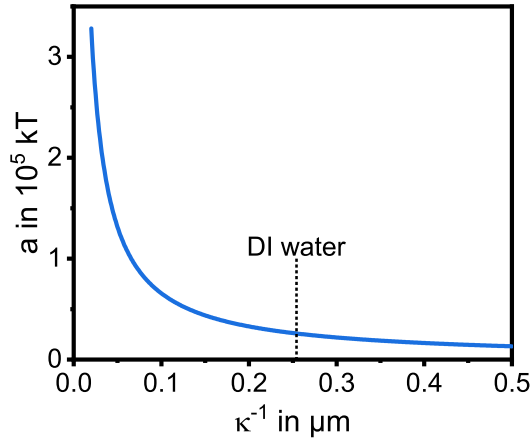

Figure S4: Plot of  $a$  vs. the Debye length  $\kappa^{-1}$  according to [Equation S12](#).

## S6 Simulation of orientation of rods in shear flow near a wall

### S6.1 Interaction with flow and wall

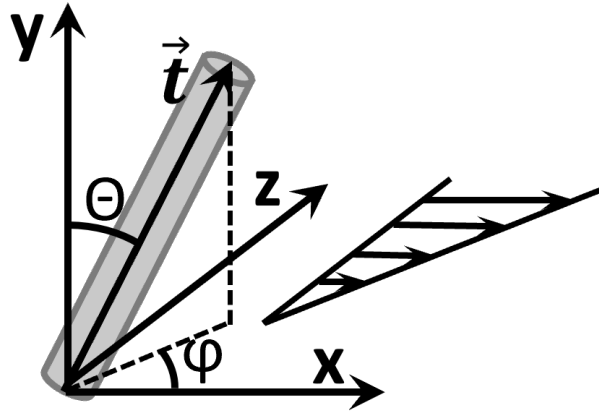

Figure S5: Coordinate system with definition of angles  $\Theta$  (angle to y-axis) and  $\Phi$  (angle of projection of  $\mathbf{u}$  on x-y plane). The flow goes in the x-direction, the gradient in the z-direction, and the wall is in the x-y plane.

In a simple shear flow, next to the wall, we have a combination of two effects: The torque  $\mathbf{M}_{wall}$  caused by the electrostatic wall-rod interaction and the hydrodynamic torque,  $\mathbf{M}_{hydr}$ , coming from the shear flow itself.

#### S6.1.1 The wall torque

The wall-induced torque is a vector orthogonal to the rod director  $\mathbf{t}$  and the plane unit normal  $\hat{\mathbf{z}}$ .

$$\mathbf{M}_{wall} = M_{wall} \mathbf{t} \times \hat{\mathbf{z}}$$

Its magnitude can be derived from the tilting angle related potential, Eq. S11 from the previous section

$$\begin{aligned} M_{wall} &= -\frac{\partial}{\partial \tau} W(h, \tau) \\ &\approx -a(h) \tau \end{aligned}$$

where  $\tau \ll 1$  is assumed to be small and  $a(h)$  is the stiffness constant from Eq. S12. In terms of the rod director components

$$\mathbf{t} = \begin{pmatrix} t_x \\ t_y \\ t_z \end{pmatrix}$$

the tilt angle  $\tau$  can be also expressed as

$$\tau \approx t_z = \sqrt{1 - t_x^2 - t_y^2}$$

### S6.1.2 Hydrodynamic torque

Following Dhont and Briels,<sup>[6]</sup> the time evolution of the rod director  $\mathbf{t}(t)$  in the simple shear flow can be described in terms of its angular velocity vector  $\boldsymbol{\omega}(t)$

$$\frac{d\mathbf{t}}{dt} = \boldsymbol{\omega} \times \mathbf{t}$$

Given the angular velocity, the hydrodynamic torque is then given by

$$\mathbf{M}_{hydr} = -\xi_{rot} [\boldsymbol{\omega} - \hat{\mathbf{t}} \times (\boldsymbol{\Gamma} \cdot \hat{\mathbf{t}}) + \varepsilon^2 \hat{\mathbf{u}} \times (\boldsymbol{\Gamma}^T \cdot \hat{\mathbf{t}})]$$

where

$$\Gamma = \dot{\gamma} \begin{pmatrix} 0 & 0 & 1 \\ 0 & 0 & 0 \\ 0 & 0 & 0 \end{pmatrix}$$

is the velocity-gradient tensor for the simple shear flow,  $\Gamma^T$  its transpose and with the two constants  $\varepsilon$  and  $\xi_{rot}$ .

$$\varepsilon^2 = \frac{3}{2} \left( \frac{2r}{L} \right)^2 \log \left( \frac{L}{2r} \right) \quad (\text{hydrodynamic aspect ratio})$$

$$\xi_{rot} = \frac{k_B T}{D_{rot}} \quad (\text{rotational friction coefficient})$$

### S6.1.3 Equation of motion

Balancing the surface torque with the hydrodynamic torque  $\mathbf{M}_{wall} = \mathbf{M}_{hydr}$  gives the equations of motion for  $\boldsymbol{\omega}$  and  $\mathbf{t}$

$$-a\tau \hat{\mathbf{t}} \times \hat{\mathbf{z}} = -\xi_{rot} [\boldsymbol{\omega} - \hat{\mathbf{t}} \times (\boldsymbol{\Gamma} \cdot \hat{\mathbf{t}}) + \varepsilon^2 \hat{\mathbf{t}} \times (\boldsymbol{\Gamma}^T \cdot \hat{\mathbf{t}})]$$

$$\frac{d\mathbf{t}}{dt} = \boldsymbol{\omega} \times \mathbf{t}$$

Solving the first one for  $\boldsymbol{\omega}$  and inserting into the second one

$$\frac{d\mathbf{t}}{dt} = \left( \hat{\mathbf{t}} \times \left[ (\boldsymbol{\Gamma} \cdot \hat{\mathbf{t}}) - \varepsilon^2 (\boldsymbol{\Gamma}^T \cdot \hat{\mathbf{t}}) + \frac{a}{\xi_{rot}} \tau \hat{\mathbf{z}} \right] \right) \times \mathbf{t}$$

or split in components:

$$\frac{d}{dt} \begin{pmatrix} t_x \\ t_y \\ t_z \end{pmatrix} = \begin{pmatrix} \dot{\gamma} t_z \\ 0 \\ \frac{a}{\xi_{rot}} t_z - \varepsilon^2 \dot{\gamma} t_x \end{pmatrix} - t_z \left( \dot{\gamma} t_x (1 - \varepsilon^2) - \frac{a}{\xi_{rot}} t_z \right) \begin{pmatrix} t_x \\ t_y \\ t_z \end{pmatrix}$$

It seems that the equations for  $t_x$  and  $t_z$  decouple from  $t_y$ :

$$\dot{t}_x = \left( \dot{\gamma} - \dot{\gamma} t_x^2 (1 - \varepsilon^2) + \frac{a}{\xi_{rot}} t_z t_x \right) t_z \quad (\text{S13})$$

$$\dot{t}_z = -\varepsilon^2 \dot{\gamma} t_x - \frac{a}{\xi_{rot}} t_z - t_z^2 \left( \dot{\gamma} t_x (1 - \varepsilon^2) - \frac{a}{\xi_{rot}} t_z \right) \quad (\text{S14})$$

#### S6.1.4 Steady state solutions and their stability

The full phase plane is displayed in [Figure S6](#), with a trivial equilibrium point for  $t_x = 0$  and  $t_z = 0$  corresponding to the preferred orientation observed in the experiment. Additionally, there are two saddle points close to  $t_x = \pm 1$ .

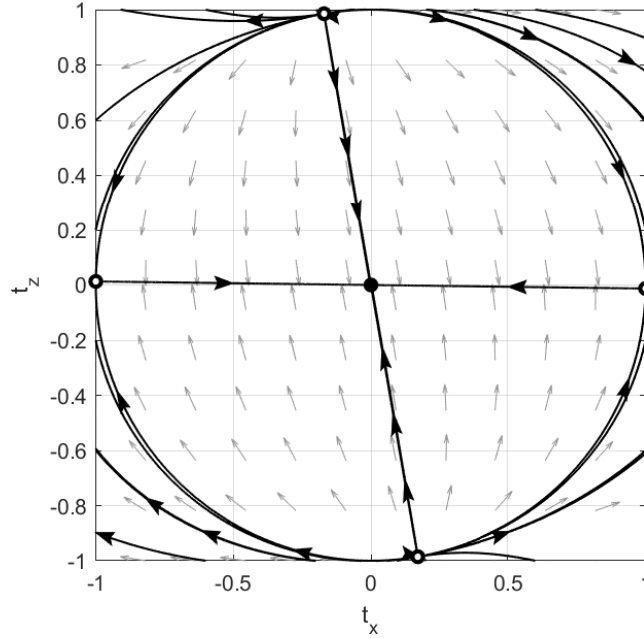

Figure S6: The (full non-linear system)  $(t_x, t_z)$  phase plane with  $\xi_{rot} = 1150 \text{ k}_B\text{T}$ s,  $\dot{\gamma} = 15 \text{ s}^{-1}$ ,  $\varepsilon = 0.273$  and  $a = 100000 \text{ k}_B\text{T}$ .<sup>[7]</sup>



### S6.1.5 Stability of the origin

In the following to proceed, we consider the  $t_{x/z}$  system and drop the small  $O(t_z^2)$  terms:

$$\dot{t}_x = \dot{\gamma} (1 - t_x^2 (1 - \varepsilon^2)) t_z \quad (\text{S15})$$

$$\dot{t}_z = -\varepsilon^2 \dot{\gamma} t_x - \frac{a}{\xi_{rot}} t_z \quad (\text{S16})$$

Scaling all by  $\dot{\gamma}$

$$\dot{\gamma}^{-1} \dot{t}_x = (1 - t_x^2 (1 - \varepsilon^2)) t_z$$

$$\dot{\gamma}^{-1} \dot{t}_z = -\varepsilon^2 t_x - \frac{a}{\xi_{rot} \dot{\gamma}} t_z$$

which we rewrite in the non-dimensional form

$$\dot{t}_x = (1 - t_x^2 (1 - \varepsilon^2)) t_z$$

$$\dot{t}_z = -\varepsilon^2 t_x - \alpha t_z$$

$$[Time] = \dot{\gamma}^{-1} \text{ (unit time)}$$

$$\alpha = \frac{a}{\xi_{rot} \dot{\gamma}}, \text{ (scaled tilt-potential stiffness)}$$

$$\varepsilon^2 = \frac{3}{2} \left( \frac{2r}{L} \right)^2 \log \left( \frac{L}{2r} \right) \text{ (hydrodyn. aspect ratio)}$$

**Small  $u_z \ll 1$  approximation:** As mentioned before, the origin  $(t_x, t_z) = 0$  is an equilibrium point. To look at its stability, we need the corresponding eigenvalues of the linearized version of the rhs:

$$\dot{t}_x \approx t_z \text{ (linearized)}$$

$$\dot{t}_z \approx -\varepsilon^2 t_x - \alpha t_z$$

$$\frac{d}{dt} \begin{pmatrix} t_x \\ t_z \end{pmatrix} \approx \underbrace{\begin{pmatrix} 0 & 1 \\ -\varepsilon^2 & -\alpha \end{pmatrix}}_{\mathbf{A}} \begin{pmatrix} t_x \\ t_z \end{pmatrix}$$

with a matrix  $\mathbf{A}$  representing the linear part of the dynamical system (around  $(0,0)$ ). Its eigenvalues are

$$\lambda_{1/2} = -\frac{\alpha}{2} \pm \sqrt{\left(\frac{\alpha}{2}\right)^2 - \varepsilon^2}$$

When  $\alpha, \varepsilon > 0$  they both have a negative real part which implies the stability of the origin. There are however two cases that manifest differently in terms of the observable motion (e.g. kayaking):

1. Case 1 (stiff tilt potential),  $\alpha \geq 2\varepsilon$ : Here we have two negative and real eigenvalues. The origin is an attractive node. There is no observable kayaking i.e. **no oscillation**, just relaxation.
2. Case 2 (soft potential),  $\alpha < 2\varepsilon$ : The root  $\sqrt{\quad}$  becomes now imaginary and we have two complex conjugate eigenvalues:

$$\begin{aligned} \text{Re}(\lambda_{1/2}) &= -\frac{\alpha}{2} \\ \text{Im}(\lambda_{1/2}) &= \pm \sqrt{\varepsilon^2 - \left(\frac{\alpha}{2}\right)^2} \end{aligned}$$

The latter means that we have a “**relaxational kayaking**” that eventually dies out.

The period of the kayaking is given as:  $T_o = \frac{2\pi}{\sqrt{\varepsilon^2 - \left(\frac{\alpha}{2}\right)^2}}$ .

The second case is particularly interesting if we have additional (thermal) excitations away from the equilibrium point.

## S6.2 Adding thermal noise to the system

To introduce Langevin thermal dynamics we add a Gaussian white noise term  $\sqrt{2k_B T / \xi_{rot}} \mathbf{N}_\omega$  to the angular velocity equation and the system now reads

$$\boldsymbol{\omega} = \hat{\mathbf{t}} \times \left[ \xi_{rot} (\boldsymbol{\Gamma} \cdot \hat{\mathbf{t}}) - \xi_{rot} \varepsilon^2 (\boldsymbol{\Gamma}^T \cdot \hat{\mathbf{t}}) + \frac{a\tau}{\xi_{rot}} \hat{\mathbf{z}} \right] + \sqrt{2k_B T / \xi_{rot}} \mathbf{N}_\omega$$

$$\frac{d\hat{\mathbf{t}}}{dt} = \boldsymbol{\omega} \times \hat{\mathbf{t}}$$

with the noise vector components  $N_{\omega,i}$  ( $i = 1, 2, 3$ )

$$\langle N_{\omega,i}(t_1) N_{\omega,j}(t_2) \rangle = \delta_{ij} \delta(t_1 - t_2)$$

where the prefactor of the noise term,  $\sqrt{2k_B T / \xi_{rot}}$ , is chosen to satisfy the fluctuation dissipation relation. Inserting one into the other we get:

$$\frac{d\hat{\mathbf{t}}}{dt} = \hat{\mathbf{t}} \times \left[ \xi_{rot} (\boldsymbol{\Gamma} \cdot \hat{\mathbf{t}}) - \xi_{rot} \varepsilon^2 (\boldsymbol{\Gamma}^T \cdot \hat{\mathbf{t}}) + \frac{a\tau}{\xi_{rot}} \hat{\mathbf{z}} \right] \times \hat{\mathbf{t}} + \sqrt{2k_B T / \xi_{rot}} \mathbf{N}_\omega \times \hat{\mathbf{t}}$$

Note that now the noise term on the r.h.s. becomes multiplicative noise, i.e. its amplitude depends on components of  $\mathbf{t}$  itself

$$\mathbf{N}_t = \begin{pmatrix} N_x \\ N_y \\ N_z \end{pmatrix} = \mathbf{N}_\omega \times \mathbf{t} = \begin{pmatrix} N_{\omega,1} \\ N_{\omega,2} \\ N_{\omega,3} \end{pmatrix} \times \begin{pmatrix} t_x \\ t_y \\ t_z \end{pmatrix} = \begin{pmatrix} N_{\omega,2} t_z - N_{\omega,3} t_y \\ N_{\omega,3} t_x - N_{\omega,1} t_z \\ N_{\omega,1} t_y - N_{\omega,2} t_x \end{pmatrix}$$

With this multiplicative noise term, the two dynamic equations for  $t_x$  and  $t_z$  read

$$\dot{t}_x = \left( \dot{\gamma} - \dot{\gamma} t_x^2 (1 - \varepsilon^2) + \frac{a}{\xi_{rot}} t_z t_x \right) t_z + N_x$$

$$\dot{t}_z = -\varepsilon^2 \dot{\gamma} t_x - \frac{a}{\xi_{rot}} t_z - t_z^2 \left( \dot{\gamma} t_x (1 - \varepsilon^2) - \frac{a}{\xi_{rot}} t_z \right) + N_z$$

Note that the equation for the y component  $t_y = \sqrt{1 - (t_x^2 + t_z^2)}$  is entirely slaved by the two others and the normalization condition for the unit director  $\mathbf{t}$ .

### S6.3 Scaled form of equations for simulation

We implement a Python simulation based on the Langevin system above. For that we scale all by  $\dot{\gamma}$

$$\begin{aligned}\frac{d}{d\hat{t}}t_x &= (1 - t_x^2 (1 - \varepsilon^2) + \alpha t_z t_x) t_z + \underbrace{\frac{N_x}{\dot{\gamma}}}_{n_x} \\ \frac{d}{d\hat{t}}t_z &= -\varepsilon^2 t_x - \alpha t_z - t_z^2 (t_x (1 - \varepsilon^2) - \alpha t_z) + \underbrace{\frac{N_z}{\dot{\gamma}}}_{n_z} \\ N_x &= \sigma (N_{\omega,2} t_z - N_{\omega,3} t_y) \\ N_y &= \sigma (N_{\omega,3} t_x - N_{\omega,1} t_z) \\ N_z &= \sigma (N_{\omega,1} t_y - N_{\omega,2} t_x) \\ \langle N_{\omega,i}(t_1) N_{\omega,j}(t_2) \rangle &= \delta_{ij} \delta(\hat{t}_1 - \hat{t}_2) \\ \sigma^2 &= \frac{2k_B T}{\xi_{rot} \dot{\gamma}} \\ \hat{t} &= t/t_s = t\dot{\gamma}\end{aligned}$$

where the dimensionless time  $\hat{t}$  is now measured in units of inverse shear rate  $t_s = 1/\dot{\gamma}$ , and the stiffness  $a$  is given by the dimensionless parameter  $\alpha = \frac{a}{\xi_{rot} \dot{\gamma}}$ . We can experimentally determine  $\xi_{rot}$  using the data used to measure the height from the rotational diffusion coefficient. For a rod length  $L = 18 \mu\text{m}$  in DI water, we get  $\xi_{rot} = 1150 \text{ k}_B\text{T}$ s which is used in the Python simulation.

## References

- [1] W. Haynes, *CRC Handbook of Chemistry and Physics, 94th Edition*, CRC Press, 2016.
- [2] J. Boussinesq, *J. Math. Pures Appl.*, 1868, **2**, 377–424.

- [3] J. L. Bitter, Y. Yang, G. Duncan, H. Fairbrother and M. A. Bevan, *Langmuir*, 2017, **33**, 9034–9042.
- [4] A. J. Hunt, F. Gittes and J. Howard, *Biophysical journal*, 1994, **67**, 766–781.
- [5] J. Teng, B. Rallabandi, H. A. Stone and J. T. Ault, *Journal of Fluid Mechanics*, 2022, **938**, A30.
- [6] J. K. G. Dhont and W. J. Briels, in *Rod-Like Brownian Particles in Shear Flow: Sections 3.1 – 3.9*, John Wiley & Sons, Ltd, 2005, ch. 3a, pp. 147–216.
- [7] Y. Zhang, Yu Zhang (2024). *Phase Portrait Plotter on 2D phase plane*, <https://www.mathworks.com/matlabcentral/fileexchange/110785-phase-portrait-plotter-on-2d-phase-plane>, Accessed: 2024-07-24.
